# Supplementary material
Source: publisher figshare collection journal article supplement (https://frontiersin.figshare.com/ndownloader/files/22723904)
Supplement: Supplementary file [file 22723904]

## Supplementary Figures

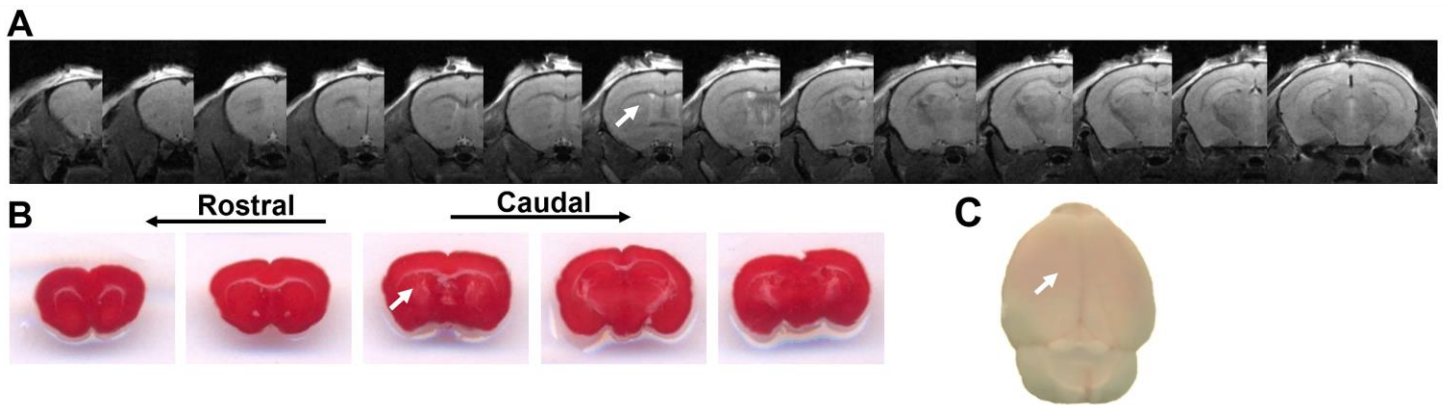

**Supplementary Figure 1.** (A) Representative MRI, (B) TTC staining and (C) Evans blue dye administration data obtained from sham-operated mice after the use of high-intensity laser irradiation (arrows indicate laser irradiated hemisphere).

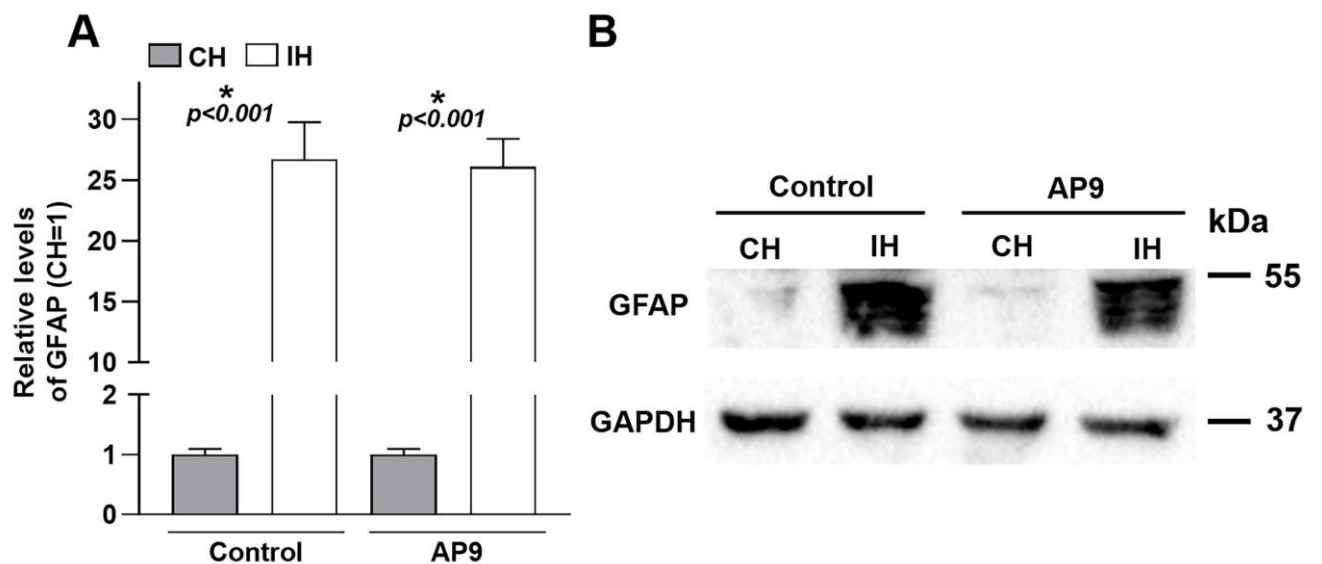

**Supplementary Figure 2.** GFAP expression 96 h post-thrombosis in control animals and AP9 treated mice: (A) data of Western blotting analysis and (B) representative blots of control and AP9 treated groups (double injection of AP9, 20 mg/kg; one-way ANOVA with Sidak correction for multiple comparisons, \* – as compared to CH).
